# Supplementary material
Source: Springer Nature journal article supplement (https://www.springermedizin.de/resource/supplementary/12885_2011_2838_MOESM9_ESM.pdf/9462126)

A

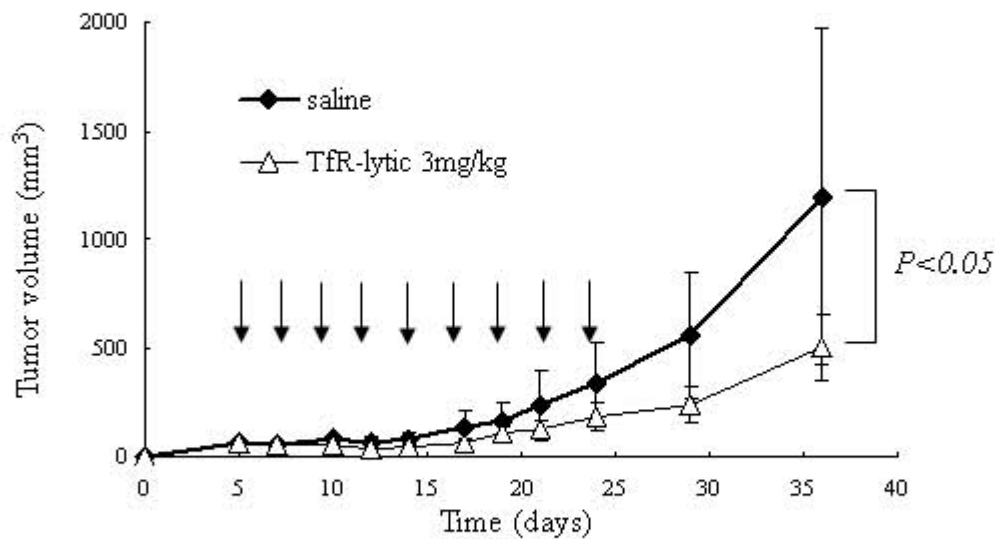

B

*Liver**Kidney**Spleen*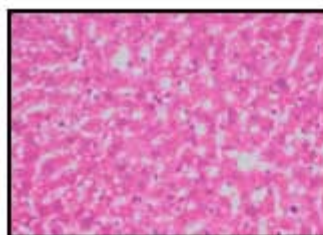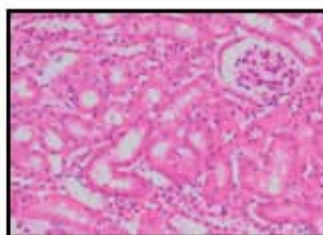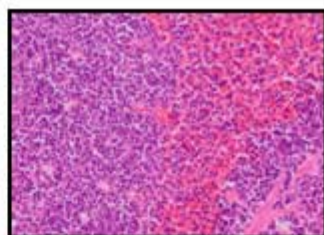*Saline*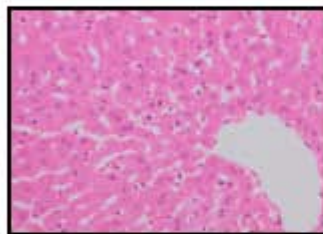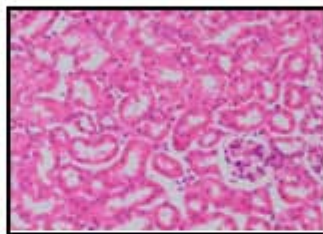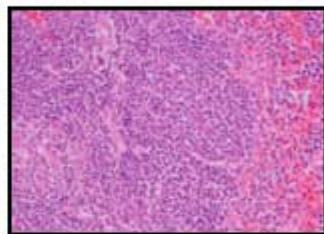*TfR-lytic*

Supplement: MOESM9 [file 9462126]
